# Supplementary material for: Multimodal Discrimination between Normal Aging, Mild Cognitive Impairment and Alzheimer’s Disease and Prediction of Cognitive Decline
Source: Diagnostics (Basel). 2018 Feb 6;8(1):14. doi: 10.3390/diagnostics8010014 (PMC5871997; doi:10.3390/diagnostics8010014)
Supplement: Supplementary file 1 [file diagnostics-08-00014-s001.xlsx]

## Sheet: Supplemental_Tables
	Supplemental Table 1. MRI model for differentiating AD and MCI groups. The model provided a c-statitisc of 0.861.
		Unit	Odds Ratio	Lower CI	Upper CI	p-value
	Age	7.2716	0.798	0.565	1.128	0.201
	Gender		1.327	0.677	2.599	0.41
	Education	3.0358	0.556	0.401	0.772	0.0005
	Left hippocampus volume	563.5	0.656	0.434	0.993	0.046
	Left fusiform volume	1278.5	1.44	0.98	2.116	0.0634
	Left postcentral surface area	412.1	0.601	0.419	0.864	0.0059
	Right middle temporal surface area	332.7	0.627	0.432	0.91	0.0141
	Right lateral occipital surface area	609.6	0.725	0.513	1.025	0.0684
	Left isthmus of the cingulate cortical thickness	0.2601	0.486	0.303	0.781	0.0028
	Right entorhinal cortical thickness	0.5304	0.613	0.411	0.915	0.0166
	Left inferior temporal cortical thickness	0.2417	0.389	0.232	0.653	0.0004
	Left posterior cingulate cortical thickness	0.1942	1.506	0.984	2.305	0.0593
	Right banks STS cortical thickness	0.2298	0.575	0.393	0.841	0.0044
	Left insula cortical thickness	0.2227	1.906	1.227	2.961	0.0041
	STS = superior temporal sulcus, CI = confidence interval
	Supplemental Table 2. MRI model for differentiating MCI and normal aging groups. The model provided a c-statitisc of 0.870.
		Unit	Odds Ratio	Lower CI	Upper CI	p-value
	Age	6.5004	0.428	0.623	0.294	<.0001
	Gender		0.46	0.925	0.229	0.0292
	Education	2.9571	0.798	1.098	0.581	0.1655
	Right hippocampus volume	549.3	0.382	0.603	0.242	<.0001
	Right caudal anterior cingulate volume	397.4	2.043	2.914	1.433	<.0001
	Left caudal middle frontal volume	1067.3	0.456	0.662	0.314	<.0001
	Left entorhinal volume	445.1	0.637	0.916	0.443	0.0151
	Right parahippocampus volume	327.3	0.753	1.06	0.536	0.1036
	Left pericalcarine surface area	212.5	1.392	1.966	0.985	0.0609
	Right postcentral surface area	414.3	1.316	1.944	0.891	0.167
	Right inferior temporal surface area	390.7	0.657	0.93	0.464	0.0179
	Right paracentral surface area	190	1.418	2.001	1.004	0.0473
	Left middle temporal cortical thickness	0.2179	0.463	0.782	0.274	0.004
	Left rostral middle frontal cortical thickness	0.1735	0.506	0.937	0.273	0.0302
	Left medial orbitofrontal cortical thickness	0.2057	0.779	1.129	0.538	0.1866
	Right banks STS cortical thickness	0.2152	0.612	0.968	0.387	0.0357
	Right supramarginal cortical thickness	0.1942	0.656	1.205	0.357	0.174
	Right inferior parietal cortical thickness	0.1909	3.365	6.597	1.716	0.0004
	Left superior frontal cortical thickness	0.196	2.761	5.285	1.443	0.0022
	CI = confidence interval
	Supplemental Table 3. MRI model for differentiating AD and normal aging groups. The model provided a c-statitisc of 0.986.
		Unit	Odds Ratio	Lower CI	Upper CI	p-value
	Age	6.1112	0.053	0.362	0.008	0.0027
	Gender		0.322	4.031	0.026	0.3792
	Education	3.2214	0.036	0.304	0.004	0.0023
	Left hippocampus volume	614.5	0.003	0.089	<0.001	0.0008
	Right caudal anterior cingulate volume	404.2	27.752	251.333	3.064	0.0031
	Left rostral anterior cingulate volume	404.5	13.234	83.442	2.099	0.006
	Left entorhinal volume	450.8	0.039	0.303	0.005	0.0019
	Right banks STS volume	475.2	0.05	0.368	0.007	0.0033
	Left insula volume	680.3	15.772	130.46	1.907	0.0105
	Left caudal middle frontal surface area	355.1	0.023	0.176	0.003	0.0003
	Left inferior temporal surface area	459.3	0.072	0.667	0.008	0.0205
	Right cuneus cortical thickness	0.1356	0.081	0.618	0.011	0.0154
	Left middle temporal cortical thickness	0.2596	<0.001	0.019	<0.001	0.0006
	Left lateral occipital cortical thickness	0.1558	40.798	436.261	3.815	0.0022
	STS = superior temporal sulcus, CI = confidence interval
	Supplemental Table 4. MRI model for differentiating between all three groups. The model provided a c-statitisc of 0.879.
		Unit	Odds Ratio	Lower CI	Upper CI	p-value
	Age	6.7044	0.518	0.401	0.668	<.0001
	Gender	0.4818	0.738	0.584	0.933	0.0112
	Education	3.0606	0.674	0.538	0.844	0.0006
	Left hippocampus surface area	580.5	0.422	0.309	0.575	<.0001
	Left caudal middle frontal surface area	1042.7	0.571	0.436	0.748	<.0001
	Right parahippocampus surface area	331	0.803	0.624	1.034	0.0885
	Right supramarginal surface area	1324.9	1.316	0.994	1.742	0.0547
	Left inferior parietal surface area	1682.9	0.769	0.581	1.018	0.0668
	Right fusiform volume	348	0.681	0.536	0.865	0.0017
	Right superior parietal cortical thickness	0.1951	2.074	1.344	3.199	0.001
	Right isthmus of the cingulate cortical thickness	0.2574	1.293	0.976	1.713	0.0732
	Left temporal pole cortical thickness	0.4169	1.371	1.016	1.85	0.0388
	Left postcentral cortical thickness	0.1556	0.739	0.53	1.03	0.0738
	Left middle temporal cortical thickness	0.2421	0.611	0.391	0.954	0.0304
	Right entorhinal cortical thickness	0.5275	0.599	0.438	0.819	0.0013
	Right rostral middle frontal cortical thickness	0.1789	0.607	0.405	0.909	0.0154
	Left inferior temporal cortical thickness	0.2419	0.523	0.34	0.805	0.0032
	Left medial orbitofrontal cortical thickness	0.2092	0.734	0.556	0.969	0.0289
	Left lateral occipital cortical thickness	0.1582	1.753	1.247	2.465	0.0012
	Right banks STS cortical thickness	0.2341	0.678	0.498	0.923	0.0137
	Right insula cortical thickness	0.2287	1.35	0.967	1.884	0.0777
	Left pars opercularis cortical thickness	0.1974	1.553	1.101	2.19	0.012
	Left superior frontal cortical thickness	0.2011	1.51	0.985	2.314	0.0588
	Right lateral orbitofrontal cortical thickness	0.2089	1.286	0.91	1.817	0.1534
	Right precuneus cortical thickness	0.1821	0.435	0.285	0.664	0.0001
	STS = superior temporal sulcus, CI = confidence interval
	Supplemental Table 5. FDG PET model for differentiating AD and MCI groups. The model provided a c-statitisc of 0.726.
		Unit	Odds Ratio	Lower CI	Upper CI	p-value
	Gender	1	0.716	0.406	1.265	0.25
	Education	3.0423	0.61	0.461	0.808	0.0006
	Age	7.0892	1.085	0.811	1.452	0.5811
	Inferior temporal FDG	1337.9	0.552	0.408	0.749	0.0001
	Postcentral FDG	1564	1.779	1.285	2.463	0.0005
	Putamen FDG	2407.4	1.425	1.043	1.946	0.0262
	STS = superior temporal sulcus, CI = confidence interval
	Supplemental Table 6. FDG PET model for differentiating MCI and normal aging groups. The model provided a c-statitisc of 0.688.
		Unit	Odds Ratio	Lower CI	Upper CI	p-value
	Gender	1	1.507	0.869	2.612	0.1444
	Education	2.9574	0.857	0.658	1.117	0.2539
	Age	6.4782	0.798	0.611	1.041	0.0965
	Entorhinal FDG	1349.3	0.549	0.361	0.835	0.0051
	Fusiform FDG	1235.9	2.439	1.342	4.434	0.0035
	Inferior temporal FDG	1301	0.576	0.341	0.975	0.04
	Isthmus of the cingulate FDG	2007.9	0.588	0.386	0.895	0.0133
	FDG = fluorodeoxyglucose, CI = confidence interval
	Supplemental Table 7. FDG PET model for differentiating AD and normal aging groups. The model provided a c-statitisc of 0.879.
		Unit	Odds Ratio	Lower CI	Upper CI	p-value
	Gender	1	1.072	0.45	2.551	0.8757
	Education	3.2507	0.574	0.379	0.869	0.0087
	Age	5.9331	1.051	0.705	1.567	0.8079
	Entorhinal FDG	1508.9	0.103	0.033	0.325	0.0001
	Isthmus of the cingulate FDG	2183.6	0.423	0.12	1.495	0.1818
	Middle temporal FDG	1686	0.231	0.106	0.501	0.0002
	Paracentral FDG	2075.2	2.471	1.02	5.987	0.0452
	Parahippocampus FDG	1576.2	4.218	1.22	14.579	0.0229
	Postcentral FDG	1575.6	3.685	1.463	9.279	0.0056
	Precuneus FDG	2083.1	0.333	0.102	1.087	0.0684
	Temporal pole FDG	1264.5	3.13	1.132	8.655	0.0279
	FDG = fluorodeoxyglucose, CI = confidence interval
	Supplemental Table 8. FDG PET model for differentiating between all three groups. The model provided a c-statitisc of 0.876.
		Unit	Odds Ratio	Lower CI	Upper CI	p-value
	Gender	1	1.047	0.69	1.589	0.8303
	Education	3.0711	0.687	0.558	0.845	0.0004
	Age	6.586	0.998	0.808	1.232	0.9817
	Entorhinal FDG	1405.3	0.718	0.566	0.912	0.0067
	Inferior parietal FDG	1761.9	0.599	0.436	0.822	0.0015
	Isthmus of the cingulate FDG	1974.2	0.588	0.431	0.803	0.0008
	Postcentral FDG	1517.7	2.675	1.988	3.601	<.0001
	Pallidum FDG	710.9	1.231	0.989	1.531	0.0624
	FDG = fluorodeoxyglucose, CI = confidence interval
	Supplemental Table 9. Neuropsyhological test model for differentiating between AD and MCI. The model provided a c-statitisc of 0.876.
		Unit	Odds Ratio	Lower CI	Upper CI	p-value
	Age	7.2572	1.183	0.846	1.653	0.3259
	Gender		1.415	0.728	2.752	0.3057
	Education	3.0323	0.69	0.501	0.951	0.0232
	Clock drawing	1.145	0.711	0.499	1.012	0.0586
	Digit span backward	2.159	0.621	0.432	0.892	0.0099
	Trails A	30.6955	2.292	1.562	3.365	<.0001
	RAVLT 30 minute delayed recall	3.1546	0.18	0.085	0.383	<.0001
	RAVLT 30 minute delayed recognition errors	2.5572	1.422	1.052	1.922	0.0221
	RAVLT = Rey Auditory Verbal Learning Test, CI = confidence interval.
	Supplemental Table 10. Neuropsyhological test model for differentiating between MCI and normal aging. The model provided a c-statitisc of 0.841.
		Unit	Odds Ratio	Lower CI	Upper CI	p-value
	Age	6.4905	0.697	0.514	0.943	0.0194
	Gender		0.948	0.514	1.748	0.8636
	Education	2.9556	1.316	0.973	1.781	0.0751
	Clock drawing	0.8879	0.698	0.502	0.971	0.0328
	Digit span backward	2.139	0.687	0.506	0.931	0.0155
	Trails B	63.4447	1.5	1.031	2.181	0.0338
	RAVLT 30 minute delayed recall	4.0983	0.359	0.252	0.512	<.0001
	RAVLT 30 minute delayed recognition errors	2.1608	1.565	0.978	2.505	0.062
	RAVLT = Rey Auditory Verbal Learning Test, CI = confidence interval.
	Supplemental Table 11. Neuropsyhological test model for differentiating between AD and normal aging. The model provided a c-statitisc of 0.992.
		Unit	Odds Ratio	Lower CI	Upper CI	p-value
	Age	6.1112	0.625	0.242	1.614	0.3315
	Gender		0.346	0.047	2.55	0.2978
	Education	3.2214	0.848	0.305	2.359	0.7523
	Clock drawing	1.2268	0.209	0.05	0.88	0.0328
	Digit span forward	2.0681	0.256	0.098	0.666	0.0052
	Trails A	32.7088	5.031	0.629	40.237	0.1278
	Trails B	87.5795	2.922	0.813	10.5	0.1004
	RAVLT 30 minute delayed recall	4.4488	0.007	<0.001	0.069	<.0001
	RAVLT 30 minute delayed recognition errors	2.3152	3.532	1.268	9.836	0.0157
	RAVLT = Rey Auditory Verbal Learning Test, CI = confidence interval.
	Supplemental Table 12. Neuropsyhological test model for differentiating between all three groups. The model provided a c-statitisc of 0.878.
		Unit	Odds Ratio	Lower CI	Upper CI	p-value
	Age	6.6961	0.88	0.706	1.096	0.2528
	Gender		1.088	0.688	1.721	0.7175
	Education	3.0582	1.009	0.802	1.269	0.9383
	Clock drawing	1.0922	0.713	0.553	0.919	0.0091
	Digit span forward	1.9859	0.786	0.604	1.022	0.0718
	Digit span backward	2.2443	0.715	0.539	0.947	0.0193
	Trails A	27.9834	1.568	1.166	2.108	0.0029
	Trails B	78.8126	1.442	1.083	1.921	0.0122
	RAVLT 30 minute delayed recall	4.0015	0.331	0.231	0.472	<.0001
	RAVLT 30 minute delayed recognition errors	2.3746	1.513	1.183	1.935	0.001
	RAVLT 30 minute delayed recognition	3.9674	0.768	0.573	1.03	0.0784
	RAVLT = Rey Auditory Verbal Learning Test, CI = confidence interval.
	Supplemental Table 13. CSF biomarker model for differentiating between MCI and AD. The model provided a c-statitisc of 0.685.
		Unit	Odds Ratio	Lower CI	Upper CI	p-value
	Age	7.252	1.134	0.773	1.663	0.5203
	Gender	1	0.974	0.449	2.11	0.9466
	Education	3.2288	0.623	0.43	0.903	0.0125
	aBeta 1-42	51.3059	0.676	0.444	1.031	0.0693
	Phosphorylated tau	19.4679	1.443	0.981	2.124	0.0628
	CI = confidence interval.
	Supplemental Table 14. CSF biomarker model for differentiating between MCI and normal aging. The model provided a c-statitisc of 0.775.
		Unit	Odds Ratio	Lower CI	Upper CI	p-value
	Age	6.4491	1.041	0.702	1.544	0.841
	Gender	1	1.423	0.635	3.191	0.3914
	Education	3.0074	0.975	0.673	1.412	0.8932
	aBeta 1-42	59.4336	0.504	0.341	0.743	0.0005
	Total tau	54.5228	2.8	1.436	5.46	0.0025
	CI = confidence interval.
	Supplemental Table 15. CSF biomarker model for differentiating between AD and normal aging. The model provided a c-statitisc of 0.904.
		Unit	Odds Ratio	Lower CI	Upper CI	p-value
	Age	6.3589	1.506	0.858	2.644	0.154
	Gender	1	1.015	0.306	3.367	0.9804
	Education	3.4583	0.553	0.306	0.999	0.0496
	aBeta 1-42	58.9351	0.233	0.117	0.464	<0.0001
	Total tau	56.2932	4.699	1.996	11.06	0.0004
	CI = confidence interval.
	Supplemental Table 16. CSF biomarker model for differentiating between all three groups. The model provided a c-statitisc of 0.753.
		Unit	Odds Ratio	Lower CI	Upper CI	p-value
	Age	6.7266	1.092	0.829	1.438	0.5309
	Gender	1	1.314	0.73	2.364	0.3621
	Education	3.2147	0.731	0.555	0.963	0.0259
	aBeta 1-42	57.4022	0.453	0.334	0.614	<0.0001
	Total tau	58.9989	1.704	1.236	2.349	0.0011
	CI = confidence interval.
	Supplemental Table 17. Multimodal model without CSF for differentiating between AD and MCI. The model provided a c-statitisc of 0.918.
		Unit	Odds Ratio	Lower CI	Upper CI	p-value
	Gender	1	1.063	0.482	2.343	0.8798
	Age	7.227	0.912	0.613	1.358	0.6511
	Education	3.0448	0.592	0.402	0.872	0.008
	Left hippocampus volume	563.4	0.538	0.307	0.942	0.0302
	Left postcentral surface area	415.7	0.669	0.457	0.981	0.0398
	Right lateral occipital surface area	611.1	0.569	0.38	0.854	0.0064
	Right entorhinal cortical thickness	0.5337	0.548	0.34	0.886	0.0141
	Left inferior temporal cortical thickness	0.2421	0.449	0.255	0.789	0.0054
	Left insula cortical thickness	0.2222	2.294	1.338	3.932	0.0025
	Clock drawing	1.1441	0.695	0.462	1.045	0.0805
	Digit span backward	2.185	0.499	0.319	0.78	0.0023
	Trails A	29.7343	2.257	1.408	3.618	0.0007
	RAVLT 30 minute delayed recall	3.1241	0.289	0.133	0.627	0.0017
	RAVLT 30 minute delayed recognition errors	2.5834	1.359	0.956	1.932	0.0875
	RAVLT = Rey Auditory Verbal Learning Test, CI = confidence interval.
	Supplemental Table 18. Multimodal model without CSF for differentiating between MCI and normal aging. The model provided a c-statitisc of 0.925.
		Unit	Odds Ratio	Lower CI	Upper CI	p-value
	Gender	1	1.325	0.592	2.965	0.4941
	Age	6.4885	0.326	0.2	0.532	<.0001
	Education	2.9591	1.201	0.805	1.793	0.3698
	Right hippocampus volume	550.3	0.371	0.209	0.657	0.0007
	Right caudal anterior cingulate volume	399.1	2.009	1.331	3.032	0.0009
	Left caudal middle frontal volume	1071.4	0.413	0.263	0.65	0.0001
	Left entorhinal volume	443.9	0.565	0.365	0.876	0.0106
	Right postcentral surface area	415.2	1.491	0.958	2.32	0.0767
	Right inferior temporal surface area	394.4	0.627	0.411	0.954	0.0294
	Left rostral middle frontal cortical thickness	0.1743	0.53	0.258	1.089	0.084
	Left medial orbitofrontal cortical thickness	0.2031	0.604	0.387	0.944	0.0268
	Left superior frontal cortical thickness	0.1948	2.444	1.182	5.051	0.0158
	Clock drawing	0.8938	0.518	0.335	0.802	0.0032
	Digit span backward	2.1521	0.555	0.37	0.83	0.0042
	RAVLT 30 minute delayed recall	4.1229	0.447	0.286	0.7	0.0004
	RAVLT 30 minute delayed recognition errors	2.197	2.014	1.05	3.865	0.0352
	Entorhinal FDG	1353.9	0.556	0.37	0.836	0.0048
	RAVLT = Rey Auditory Verbal Learning Test, FDG = fluorodeoxyglucose, CI = confidence interval.
	Supplemental Table 19. Multimodal model without CSF for differentiating between AD and normal aging. The model provided a c-statitisc of 0.996.
		Unit	Odds Ratio	Lower CI	Upper CI	p-value
	Age	0.596	0.006	0.061	6.2689	0.0161
	Education	3.201	0.061	0.442	3.4912	0.419
	Left hippocampus volume	0.203	<0.001	0.004	608.5	0.006
	RAVLT 30 minute delayed recall	0.078	<0.001	<0.001	4.4269	0.0038
	RAVLT = Rey Auditory Verbal Learning Test, CI = confidence interval.
	Supplemental Table 20. Multimodal model without CSF for differentiating between all three groups. The model provided a c-statitisc of 0.928.
		Unit	Odds Ratio	Lower CI	Upper CI	p-value
	Gender	1	1.44	0.816	2.54	0.2082
	Age	6.5939	0.59	0.434	0.801	0.0007
	Education	3.0738	0.823	0.628	1.079	0.1582
	Left hippocampus volume	579.7	0.401	0.268	0.6	<.0001
	Left caudal middle frontal volume	1047.1	0.527	0.379	0.733	0.0001
	Right superior parietal cortical thickness	0.1978	2.205	1.342	3.623	0.0018
	Right isthmus of the cingulate cortical thickness	0.2569	1.277	0.918	1.775	0.1469
	Left temporal pole cortical thickness	0.4168	1.33	0.943	1.875	0.1039
	Left postcentral cortical thickness	0.156	0.637	0.435	0.932	0.0204
	Right entorhinal cortical thickness	0.5277	0.584	0.4	0.853	0.0054
	Left inferior temporal cortical thickness	0.2422	0.5	0.324	0.773	0.0018
	Left medial orbitofrontal cortical thickness	0.206	0.693	0.507	0.946	0.0209
	Left lateral occipital cortical thickness	0.1592	1.757	1.19	2.596	0.0046
	Right banks STS cortical thickness	0.2307	0.723	0.502	1.04	0.0806
	Right insula cortical thickness	0.2269	1.47	1.025	2.107	0.0362
	Left pars opercularis cortical thickness	0.1949	1.596	1.093	2.331	0.0156
	Right precuneus cortical thickness	0.1824	0.629	0.389	1.017	0.0588
	Clock drawing	1.0942	0.717	0.524	0.979	0.0366
	Digit span forward	1.9747	0.711	0.52	0.973	0.0328
	Digit span backward	2.2542	0.648	0.469	0.896	0.0087
	Trails A	27.2389	1.773	1.262	2.491	0.001
	RAVLT 30 minute delayed recall	4.0116	0.443	0.293	0.67	0.0001
	RAVLT 30 minute delayed recognition errors	2.4043	1.647	1.218	2.227	0.0012
	RAVLT 30 minute delayed recognition	4.026	0.772	0.548	1.089	0.1403
	Isthmus of the cingulate FDG	1971.5	0.69	0.494	0.964	0.0298
	Postcentral FDG	1521.5	1.391	0.991	1.952	0.0561
	Pallidum FDG	712.3	1.272	0.984	1.644	0.0664
	STS = superior temporal sulcus, RAVLT = Rey Auditory Verbal Learning Test, FDG = fluorodeoxyglucose, CI = confidence interval.
